# Supplementary material for: Lentivector cryptic splicing mediates increase in CD34+ clones expressing truncated HMGA2 in human SCID-X1
Source: Research Square preprint supplement (doi:10.21203/rs.3.rs-858393/v1), 2021-10-15
Supplement: Supplementary file 1 [file 9714993a7d9780c4576adbb6.docx]

Supplementary Materials for

**Lentivector cryptic splicing mediates increase in CD34+ clones expressing truncated *HMGA2* in human SCID-X1**

**Authors:**

Suk See De Ravin1, Siyuan Liu2, Colin L. Sweeney1, Julie Brault1, Narda Whiting-Theobald1, Michelle Ma1, Taylor Liu1, Uimook Choi1, Janet Lee1, Sandra Anaya O’Brien1, Priscilla Quackenbush1, Tyra Estwick1, Anita Karra1, Nana Kwatemaa1, Shuang Guo2, Ling Su2, Zhonghe Sun2, Sheng Zhou3, Harry L. Malech1, Xiaolin Wu1

**Affiliations:**

1 Laboratory of Clinical Immunology and Microbiology, NIAID, NIH, Bethesda, MD 20892

2Cancer Research Technology Program, Leidos Biomedical Research, Inc., Frederick National Laboratory for Cancer Research, Frederick, MD, 21702

3 Experimental Cell Therapeutics Lab, St. Jude Children’s Research Hospital, Memphis, TN, 38105

* Correspondence:

1. Suk See DeRavin, MD, PhD

[sderavin@niaid.nih.gov](mailto:sderavin@niaid.nih.gov)

1. Harry L. Malech, MD

hmalech@niaid.nih.gov

1. Xiaolin Wu PhD

[forestwu@mail.nih.gov](mailto:forestwu@mail.nih.gov)

**This file includes:**

1. Supplementary Figure S1
2. Supplemental Tables

- Supplemental Table S1 (Excel document) Multi-insert-clones
- Supplemental Table S2 (Excel document) SingleCelliPSCclonesFusionTranscripts

Fig. S1

Fig. S1

LV CL20-i4-EF1a-hgcOPT insert with HMGA2 splice fusion annotation (Linear, 4638basepairs). Shown is the vector insert sequence following lentivector insertion in the CD34+ cell genome. The genomic sequence of the insert site begins before the shown 5’ end and after the 3’ end of the vector insert sequence. The figure is shown with annotations as for an insertion into HMGA2 intron 3, and the generation of a truncated fusion RNA transcript when the vector is inserted in the sense (forward) orientation within an intron of any expressed gene.

Table S1.

Table S1 is submitted as an excel document of lists of multi-insert clones harboring the top frequency VIS from different patients (Table S1).

Table S2.

Table S2 (Excel document). Fusion Transcripts by vector gene trapping of targeted genes in iPS clones. VIS that are in the same orientation of gene and inside introns are highlighted, which is expected to be terminated.
